# Supplementary material for: MHC I Stabilizing Potential of Computer-Designed Octapeptides
Source: Hindawi journal article supplement (doi:10.1155/2010/396847), 2010-01-01
Supplement: f1 [file 396847.f1.pdf]

# Supplementary Material

## MHC I Stabilizing Potential of Computer-Designed Octapeptides

Joanna M. Wisniewska, Natalie Jäger, Anja Freier, Florian O. Losch, Karl-Heinz Wiesmüller, Peter Walden, Paul Wrede, Gisbert Schneider, Jan A. Hiss

**Supplementary 1:** Descriptor list and specifications. Five defined ‘descriptor spaces’ (sets a.-e.):

- 40-dimensional ( $8 \times 5$ ): hydrophobicity [1]; hydrophilicity [2]; bulkiness [3]; refractivity [4]; H-2K<sup>b</sup> stabilization values [5].
- 40-dimensional ( $8 \times 5$ ): flexibility [6]; number of possible hydrogen bonds [7]; molecular weight [8]; isoelectricity [9]; hydrophobicity [10].
- 48-dimensional ( $8 \times 6$ ): six pharmacophoric features of the 20 standard amino acids [11].
- 264-dimensional ( $8 \times 33$ ): 33 descriptors selected from a set of 184 descriptors that were computed by the software package MOE (Molecular Operation Environment, v2006.08, Chemical Computing Group, Inc., Montreal, Canada). The 33 descriptors were selected based on Kolmogorov-Smirnov statistics [12], so that they separate stabilizing from non-stabilizing octapeptides in at least five residue positions at the 5% significance level. The descriptor space d. consists of following 33 descriptors: diameter, VDistEq, VDistMa, einerPath, weinerPol, BCUT\_PEOE\_2, CUT\_SLOGP\_2, BCUT\_SMR\_1, BCUT\_SMR\_2, BCUT\_SMR\_3, GCUT\_PEOE\_3, GCUT\_SLOGP\_3, a\_count, a\_IC, a\_ICM, b\_count, chi0v, chi1v, a\_heavy, a\_nC, b\_heavy, chi0, chi1\_C, VAdjEq, zagreb, PEOE\_RPC, PEOE\_VSA-0, PEOE\_VSA\_POS, Kier2, KierA1, KierA2, KierA3, vsa\_hyd.
- 904-dimensional ( $8 \times 113$ ): 113 descriptors selected from a set of more than 1600 descriptors of the software package DragonX (DRAGON for Linux (software for Molecular Descriptor Calculations) Version 1.2, 2006) using Kolmogorov-Smirnov statistics which separate stabilizing from non-stabilizing octapeptides in at least six residue positions. The descriptor space e. includes following 113 descriptors: MW, Sv, Se, Sp, Ss, nAT, nBT, ZM1V, ZMV, Dz, SMTIV, GMTIV, WhetZ, Whetm, Whetv, Whete, Whetp, Jhetp, DEL, S0K, S1K, S2K, X0v, X1v, XMO, ISIZ, IAC, TIC0, BIC0, SIC1, CIC1, BIC1, IC3, IC4, TIC4, IC5, TIC5, SIC5, BIC5, ATS1m, ATS2m, ATS3m, ATS1e, ATS2e, ATS3e, ATS4e, MATS1m, MATS2m, MATS1v, MATS2v, MATS1e, MATS1p, MATS2p, EEig02d, EEig03d, EEig04d, EEig06d, EEig09d, ESpm02d, ESpm03d, ESpm04d, ESpm05d, ESpm06d, ESpm03r, ESpm04r, ESpm05r, BEHm3, BEHm4, BEHm5, BEHm6, BELm1, BELm2, BELm4, BELm6, BEHv2, BEHv3, BEHv4, BEHv5, BEHv6, BEHv7, BELv5, BEHe2, BEHe3, BEHe4, BEHe5, BEHe6, BELe2, BELe4, BEHp2, BEHp4, BEHp5, BEHp6, BEHp7, BELp5, Eig1Z, Eig1m, Eig1v, Eig1e, Eig1p, AEigZ, AEigm, AEigv, AEige, AEigp, VEZ1, VEZ2, VEm1, VEm2, VRv1, VEe1, VEe2, VRp1, AMR.

**Supplementary 2:** Experimentally tested octapeptides. Sequences are given in single-letter code, motif anchor positions fulfilling the SYFPEITHI motif are underlined. *S*-score: SYFPEITHI score [13]. IEDB-ANN score: predicted  $IC_{50}$  values by IEDB-ANN method [14]. < 500 nM: recommended cutoff for IEDB-ANN score [14] for binders predicted with intermediate affinity; *active*: IEDB-ANN score < 500 nM; *0*: IEDB-ANN score > 500 nM.  $EC_{50}$  values correspond to the peptide concentration required for 50% of maximal MHC I protein stabilization; values in brackets are standard deviations ( $N = 3$ ). n.d.: not detectable.

|                      | Peptide number | Sequence                           | <i>S</i> -score | IEDB-ANN score [ $\mu$ M] | < 500 nM | Experimental $EC_{50}$ [ $\mu$ M] |
|----------------------|----------------|------------------------------------|-----------------|---------------------------|----------|-----------------------------------|
| stabilizing peptides | 1              | FRYPYK <u>T</u> L                  | 27              | 0.5                       | active   | 24.0 ( $\pm$ 11)                  |
|                      | 2              | FRYI <u>Y</u> H <u>T</u> L         | 27              | 0.2                       | active   | 20.0 ( $\pm$ 4.0)                 |
|                      | 3              | FHW <u>D</u> Y <u>R</u> G <u>L</u> | 22              | 0.4                       | active   | 25.0 ( $\pm$ 11)                  |
|                      | 4              | WRFKY <u>D</u> N <u>L</u>          | 22              | 2.3                       | 0        | 7.0 ( $\pm$ 4.0)                  |
|                      | 5              | WRFV <u>Y</u> W <u>R</u> L         | 20              | 1.2                       | 0        | 8.0 ( $\pm$ 4.0)                  |
|                      | 6              | WRFY <u>F</u> N <u>L</u>           | 21              | 0.4                       | active   | 3.6 ( $\pm$ 1.2)                  |

|                                                   |                                    |                                    |      |      |        |                  |
|---------------------------------------------------|------------------------------------|------------------------------------|------|------|--------|------------------|
|                                                   | 7                                  | WDFK <u>F</u> DS <u>V</u>          | 17   | 4.7  | 0      | 9.0 ( $\pm$ 4.0) |
|                                                   | 8                                  | WK <u>F</u> I <u>F</u> DP <u>V</u> | 16   | 3.0  | 0      | 0.4 ( $\pm$ 0.1) |
|                                                   | 9                                  | FHH <u>A</u> HRT <u>V</u>          | 8    | 10.5 | 0      | 9.0 ( $\pm$ 4.0) |
| non-stabilizing peptides of category i            | 10                                 | FR <u>Y</u> E <u>Y</u> RS <u>L</u> | 28   | 0.1  | active | n.d.             |
|                                                   | 11                                 | WR <u>Y</u> I <u>Y</u> HS <u>I</u> | 22   | 2.5  | 0      | n.d.             |
|                                                   | 12                                 | HR <u>Y</u> V <u>Y</u> RNI         | 24   | 0.4  | active | n.d.             |
|                                                   | 13                                 | FH <u>Y</u> A <u>Y</u> RS <u>V</u> | 23   | 0.1  | active | n.d.             |
|                                                   | 14                                 | YR <u>Y</u> K <u>Y</u> DRL         | 27   | 0.5  | 0      | n.d.             |
|                                                   | 15                                 | WR <u>Y</u> Q <u>Y</u> DNL         | 27   | 0.7  | 0      | n.d.             |
|                                                   | 16                                 | WR <u>Y</u> R <u>Y</u> WS <u>L</u> | 27   | 0.6  | 0      | n.d.             |
|                                                   | 17                                 | WR <u>Y</u> N <u>Y</u> DPL         | 26   | 1.7  | 0      | n.d.             |
|                                                   | 18                                 | WR <u>Y</u> H <u>Y</u> DPL         | 26   | 2.4  | 0      | n.d.             |
|                                                   | 19                                 | WK <u>Y</u> Q <u>Y</u> DNL         | 27   | 0.3  | active | n.d.             |
|                                                   | 20                                 | WK <u>Y</u> I <u>F</u> DP <u>V</u> | 22   | 1.2  | 0      | n.d.             |
| 21                                                | WK <u>Y</u> P <u>F</u> DP <u>V</u> | 22                                 | 2.0  | 0    | n.d.   |                  |
| non-stabilizing peptides of category ii           | 22                                 | FR <u>Y</u> L <u>Y</u> KNA         | 17   | 1.2  | 0      | n.d.             |
|                                                   | 23                                 | FR <u>Y</u> V <u>W</u> RTL         | 18   | 1.7  | 0      | n.d.             |
|                                                   | 24                                 | FH <u>Y</u> L <u>Y</u> HTA         | 17   | 0.9  | 0      | n.d.             |
|                                                   | 25                                 | FR <u>Y</u> P <u>Y</u> HTP         | 17   | 17.8 | 0      | n.d.             |
|                                                   | 26                                 | FR <u>W</u> E <u>Y</u> RGL         | 22   | 0.7  | 0      | n.d.             |
|                                                   | 27                                 | FR <u>H</u> I <u>Y</u> RTI         | 18   | 9.3  | 0      | n.d.             |
|                                                   | 28                                 | FR <u>H</u> G <u>Y</u> RQI         | 18   | 12.6 | 0      | n.d.             |
|                                                   | 29                                 | FH <u>W</u> A <u>Y</u> HTV         | 17   | 1.2  | 0      | n.d.             |
|                                                   | 30                                 | WR <u>W</u> L <u>Y</u> KGV         | 16   | 4.3  | 0      | n.d.             |
|                                                   | 31                                 | WR <u>F</u> P <u>Y</u> DQL         | 21   | 6.6  | 0      | n.d.             |
|                                                   | 32                                 | WR <u>F</u> K <u>Y</u> DPL         | 21   | 3.3  | 0      | n.d.             |
|                                                   | 33                                 | WR <u>F</u> P <u>Y</u> DKL         | 21   | 6.8  | 0      | n.d.             |
|                                                   | 34                                 | WR <u>F</u> V <u>Y</u> DNL         | 21   | 1.9  | 0      | n.d.             |
|                                                   | 35                                 | WK <u>F</u> K <u>F</u> DP <u>V</u> | 17   | 2.8  | 0      | n.d.             |
| 36                                                | WK <u>I</u> N <u>F</u> DP <u>V</u> | 17                                 | 8.2  | 0    | n.d.   |                  |
| 37                                                | TTE <u>W</u> Y <u>T</u> KI         | 18                                 | 3.4  | 0    | n.d.   |                  |
| 5 of 23 non-stabilizing peptides of               | 38                                 | RGE <u>V</u> F <u>T</u> AT         | 13   | 24.0 | 0      | n.d.             |
|                                                   | 39                                 | FH <u>Y</u> D <u>H</u> RNA         | 9    | 6.5  | 0      | n.d.             |
|                                                   | 40                                 | HR <u>W</u> V <u>F</u> WQP         | 11   | 26.0 | 0      | n.d.             |
|                                                   | 41                                 | SIK <u>N</u> F <u>H</u> YY         | 12   | 13.6 | 0      | n.d.             |
|                                                   | 42                                 | FR <u>H</u> D <u>Y</u> HSP         | 11   | 29.2 | 0      | n.d.             |
| 7 of 120 non-stabilizing peptides of category iv  | 43                                 | TVE <u>Q</u> G <u>V</u> TQ         | 1    | 37.5 | 0      | n.d.             |
|                                                   | 44                                 | FHH <u>G</u> H <u>N</u> VP         | 0    | 36.8 | 0      | n.d.             |
|                                                   | 45                                 | QDG <u>H</u> E <u>I</u> HR         | 1    | 38.4 | 0      | n.d.             |
|                                                   | 46                                 | TVE <u>Q</u> G <u>V</u> TQ         | 1    | 37.5 | 0      | n.d.             |
|                                                   | 47                                 | GVD <u>Q</u> S <u>Y</u> LK         | 0    | 38.1 | 0      | n.d.             |
|                                                   | 48                                 | SVEN <u>P</u> ILR                  | 2    | 33.7 | 0      | n.d.             |
|                                                   | 49                                 | NEG <u>W</u> T <u>I</u> HR         | 1    | 38.8 | 0      | n.d.             |
|                                                   | 50                                 | SVD <u>H</u> S <u>I</u> FK         | 2    | 36.1 | 0      | n.d.             |
| 18 of 23 non-stabilizing peptides of category iii | 51                                 | FH <u>Y</u> G <u>H</u> KTA         | 7    | 16.2 | 0      | n.d.             |
|                                                   | 52                                 | FH <u>Y</u> I <u>H</u> RSA         | 7    | 0.42 | 0      | n.d.             |
|                                                   | 53                                 | WK <u>F</u> R <u>V</u> DR <u>V</u> | 7    | 15.9 | 0      | n.d.             |
|                                                   | 54                                 | HGE <u>F</u> Y <u>P</u> LP         | 11   | 30.0 | 0      | n.d.             |
|                                                   | 55                                 | HGE <u>W</u> Y <u>P</u> FD         | 11   | 32.2 | 0      | n.d.             |
|                                                   | 56                                 | TIK <u>N</u> DD <u>S</u> I         | 7    | 31.8 | 0      | n.d.             |
|                                                   | 57                                 | GIK <u>Q</u> Y <u>R</u> YK         | 12   | 28.4 | 0      | n.d.             |
|                                                   | 58                                 | RGD <u>Y</u> Y <u>A</u> TE         | 13   | 23.3 | 0      | n.d.             |
|                                                   | 59                                 | GIE <u>N</u> F <u>H</u> KD         | 12   | 34.5 | 0      | n.d.             |
|                                                   | 60                                 | VVD <u>H</u> F <u>R</u> SP         | 11   | 23.2 | 0      | n.d.             |
|                                                   | 61                                 | VVE <u>H</u> F <u>R</u> LW         | 11   | 17.3 | 0      | n.d.             |
|                                                   | 62                                 | VIEN <u>F</u> SAY                  | 12   | 9.5  | 0      | n.d.             |
|                                                   | 63                                 | HGE <u>Y</u> Y <u>R</u> QH         | 13   | 32.9 | 0      | n.d.             |
| 64                                                | HGD <u>F</u> Y <u>I</u> VS         | 12                                 | 29.4 | 0    | n.d.   |                  |
| 65                                                | RGE <u>P</u> NS <u>L</u> I         | 9                                  | 33.0 | 0    | n.d.   |                  |

|       |          |    |      |   |      |
|-------|----------|----|------|---|------|
| 66    | HGEWYHFA | 11 | 25.7 | 0 | n.d. |
| 67    | HGEWYPPG | 11 | 29.6 | 0 | n.d. |
| 68    | RGKWEKRI | 8  | 30.3 | 0 | n.d. |
| <hr/> |          |    |      |   |      |
| 69    | SDGHQPHR | 1  | 36.0 | 0 | n.d. |
| 70    | QEGWDGRR | 0  | 38.5 | 0 | n.d. |
| 71    | NEGHGIHR | 1  | 39.0 | 0 | n.d. |
| 72    | NGGWGVHR | 1  | 36.6 | 0 | n.d. |
| 73    | NEGYDPHR | 0  | 38.8 | 0 | n.d. |
| 74    | NEGHTIHR | 1  | 39.2 | 0 | n.d. |
| 75    | QDGHQAHR | 0  | 37.7 | 0 | n.d. |
| 76    | NEGWQAKR | 1  | 39.0 | 0 | n.d. |
| 77    | NDGWDPHR | 0  | 38.9 | 0 | n.d. |
| 78    | QDGHSVHR | 0  | 38.1 | 0 | n.d. |
| 79    | QDGYNPHR | 0  | 37.0 | 0 | n.d. |
| 80    | SDGHQPKR | 2  | 36.9 | 0 | n.d. |
| 81    | QDGWGPFR | 0  | 37.1 | 0 | n.d. |
| 82    | NEVHGARN | 0  | 38.2 | 0 | n.d. |
| 83    | NDPHEIHN | 2  | 38.1 | 0 | n.d. |
| 84    | NEVYGPHQ | 0  | 37.4 | 0 | n.d. |
| 85    | QGIYGVHN | 2  | 33.0 | 0 | n.d. |
| 86    | QDEHGIRN | 1  | 39.0 | 0 | n.d. |
| 87    | QDIHGARQ | 1  | 35.8 | 0 | n.d. |
| 88    | NEPFTIKN | 3  | 37.8 | 0 | n.d. |
| 89    | NDAWGLHQ | 0  | 39.2 | 0 | n.d. |
| 90    | QEVHGIHQ | 1  | 37.5 | 0 | n.d. |
| 91    | GVETDADN | 0  | 39.6 | 0 | n.d. |
| 92    | GVEWKADN | 0  | 39.6 | 0 | n.d. |
| 93    | GVEADRDN | 1  | 40.0 | 0 | n.d. |
| 94    | GAEGERDN | 2  | 40.0 | 0 | n.d. |
| 95    | GAEADAWN | 1  | 39.6 | 0 | n.d. |
| 96    | GVEEKADN | 1  | 39.7 | 0 | n.d. |
| 97    | GVEGEADN | 0  | 39.7 | 0 | n.d. |
| 98    | GAEDERDN | 3  | 39.9 | 0 | n.d. |
| 99    | SVEGEADN | 1  | 38.6 | 0 | n.d. |
| 100   | GVEDEPDN | 1  | 39.6 | 0 | n.d. |
| 101   | GVEGDPDN | 0  | 39.7 | 0 | n.d. |
| 102   | GVEGDRVN | 1  | 40.0 | 0 | n.d. |
| 103   | GVEGDADN | 0  | 39.8 | 0 | n.d. |
| 104   | GAEEERVN | 3  | 39.6 | 0 | n.d. |
| 105   | SVDGERTK | 3  | 38.6 | 0 | n.d. |
| 106   | GADAKADK | 1  | 39.3 | 0 | n.d. |
| 107   | GVDGEADK | 0  | 39.3 | 0 | n.d. |
| 108   | GADDEPDK | 2  | 39.5 | 0 | n.d. |
| 109   | GVDFEADK | 0  | 38.9 | 0 | n.d. |
| 110   | GVDSDAWK | 0  | 39.1 | 0 | n.d. |
| 111   | GVKGKADK | 0  | 29.6 | 0 | n.d. |
| 112   | GVDDEADK | 1  | 30.5 | 0 | n.d. |
| 113   | GVDQSWKG | 1  | 38.4 | 0 | n.d. |
| 114   | SIKQSNYY | 2  | 33.5 | 0 | n.d. |
| 115   | SVDNSVVF | 1  | 33.4 | 0 | n.d. |
| 116   | TPENPTYW | 1  | 35.1 | 0 | n.d. |
| 117   | SVEKGVVH | 2  | 37.6 | 0 | n.d. |
| 118   | SVETVTSP | 2  | 35.7 | 0 | n.d. |
| 119   | SIDNGVW  | 2  | 30.8 | 0 | n.d. |
| 120   | SVENGVLR | 1  | 33.9 | 0 | n.d. |
| 121   | TVDNVILR | 1  | 33.2 | 0 | n.d. |
| 122   | TPENSVVR | 0  | 36.9 | 0 | n.d. |
| 123   | VVEWPVHN | 0  | 34.1 | 0 | n.d. |
| 124   | SVEQSVVH | 1  | 38.0 | 0 | n.d. |
| 125   | GIFQQNLP | 1  | 32.0 | 0 | n.d. |
| 126   | SVELSIHP | 2  | 35.5 | 0 | n.d. |
| 127   | GIDQGVFH | 1  | 38.3 | 0 | n.d. |
| 128   | SVEQGILR | 2  | 34.3 | 0 | n.d. |
| 129   | TVENSIHK | 1  | 36.0 | 0 | n.d. |
| 130   | SIWQVTKD | 4  | 24.2 | 0 | n.d. |
| 131   | SVDQGLLQ | 1  | 36.5 | 0 | n.d. |

113 of 120 non-stabilizing peptides of category iv

|     |           |   |      |   |      |
|-----|-----------|---|------|---|------|
| 132 | TVESVSSP  | 1 | 36.4 | 0 | n.d. |
| 133 | GIRQSLKE  | 2 | 37.5 | 0 | n.d. |
| 134 | TPDNGLFR  | 0 | 36.6 | 0 | n.d. |
| 135 | SVDQGLKE  | 2 | 36.9 | 0 | n.d. |
| 136 | TVENSVPQ  | 0 | 35.3 | 0 | n.d. |
| 137 | TVENLSSY  | 1 | 33.0 | 0 | n.d. |
| 138 | SVEPESHG  | 2 | 37.2 | 0 | n.d. |
| 139 | SVENGILW  | 2 | 32.0 | 0 | n.d. |
| 140 | SIDQGVAE  | 2 | 32.7 | 0 | n.d. |
| 141 | SIEWGLFK  | 2 | 34.3 | 0 | n.d. |
| 142 | SVEPDSHG  | 2 | 37.6 | 0 | n.d. |
| 143 | TVENGLVQ  | 0 | 38.2 | 0 | n.d. |
| 144 | SVENGVPQ  | 1 | 34.1 | 0 | n.d. |
| 145 | SIKQSNPE  | 2 | 36.9 | 0 | n.d. |
| 146 | STEPDVAW  | 1 | 34.9 | 0 | n.d. |
| 147 | TVDTTVSW  | 0 | 33.1 | 0 | n.d. |
| 148 | IVDHGTAP  | 2 | 37.0 | 0 | n.d. |
| 149 | TVEQGILH  | 1 | 37.9 | 0 | n.d. |
| 150 | TVEPWRSW  | 1 | 32.9 | 0 | n.d. |
| 151 | GLDPDRHW  | 1 | 38.7 | 0 | n.d. |
| 152 | WTEWVSPP  | 1 | 34.8 | 0 | n.d. |
| 153 | KVEQSSPE  | 1 | 36.2 | 0 | n.d. |
| 154 | IVEWGVHW  | 1 | 23.8 | 0 | n.d. |
| 155 | IVEHSDVP  | 1 | 38.7 | 0 | n.d. |
| 156 | IVKQGTKW  | 3 | 28.2 | 0 | n.d. |
| 157 | VVEQSIRY  | 3 | 30.6 | 0 | n.d. |
| 158 | HVEQGSLY  | 1 | 38.2 | 0 | n.d. |
| 159 | IVEWITAG  | 2 | 35.2 | 0 | n.d. |
| 160 | HPEQGV RW | 0 | 36.6 | 0 | n.d. |
| 161 | TVDNSVAY  | 0 | 35.8 | 0 | n.d. |
| 162 | VVDPVLHY  | 0 | 29.3 | 0 | n.d. |
| 163 | HPEHGV RW | 0 | 37.1 | 0 | n.d. |
| 164 | SVEQPLDP  | 1 | 37.4 | 0 | n.d. |
| 165 | TLDWGV RW | 0 | 31.2 | 0 | n.d. |
| 166 | TLKNSKNW  | 1 | 31.6 | 0 | n.d. |
| 167 | TFAHGV RW | 0 | 24.7 | 0 | n.d. |
| 168 | IVELTSAY  | 2 | 30.8 | 0 | n.d. |
| 169 | SVENPIAQ  | 2 | 35.0 | 0 | n.d. |
| 170 | RGTYHR TK | 4 | 34.4 | 0 | n.d. |
| 171 | RGKYGP FE | 2 | 34.8 | 0 | n.d. |
| 172 | RGDREPPA  | 3 | 33.7 | 0 | n.d. |
| 173 | VVEWVEHY  | 1 | 31.8 | 0 | n.d. |
| 174 | RGDNPSYT  | 3 | 34.7 | 0 | n.d. |
| 175 | RGEPLALA  | 2 | 34.0 | 0 | n.d. |
| 176 | RGEHWIDQ  | 3 | 36.2 | 0 | n.d. |
| 177 | RGEIWIFW  | 3 | 27.1 | 0 | n.d. |
| 178 | TVDISTVH  | 1 | 39.0 | 0 | n.d. |
| 179 | RGEIWHLQ  | 2 | 36.4 | 0 | n.d. |
| 180 | SVEISIAQ  | 2 | 35.8 | 0 | n.d. |

---

#### Supplementary References:

- [1] D. M. Engelman, T. A. Steitz, A. Goldman, *Annu. Rev. Biophys. Biophys. Chem.* 1986, 15, 321–353.
- [2] T. P. Hopp, K. R. Woods, *Proc. Natl. Acad. Sci. USA* 1981, 8, 3824–3828.
- [3] D. D. Jones, *J. Theor. Biol.* 1975, 50, 167–184.
- [4] K. Udaka, K. H. Wiesmuller, S. Kienle, G. Jung, P. Walden, *J. Biol. Chem.* 1995, 270, 24130–24134.
- [5] R. Bhaskaran, P. K. Ponnuswamy, *Int. J. Pept. Prot. Res.* 1988, 32, 241–255.
- [6] D. S. Dwyer, *J. Biomol. Struct. Dyn.* 2001, 18, 881–892.
- [7] G. D. Fasman, *Handbook of Biochemistry and Molecular Biology, Proteins* CRC Press, Cleveland, 1976.
- [8] G. D. Fasman, *Handbook of Biochemistry and Molecular Biology, Proteins* CRC Press, Cleveland, 1976.
- [9] J. M. Zimmerman, N. Eliezer, R. Simha, *J. Theor. Biol.* 1968, 21, 170–201.
- [10] S. D. Black, D. R. Mould, *Anal. Biochem.* 1991, 193, 72–82.

- [11] G. Schneider, K.-H. Baringhaus, *Molecular Design – Concepts and Applications*, Wiley-VCH, Weinheim, 2008.
- [12] D. N. Rassokhin, D. K. Agrafiotis, *J. Mol. Graph. Model.* 2000, 18,368–382.
- [13] H. G. Rammensee, J. Bachmann, N. N. Emmerich, O. A. Bachor and S. Stevanovic, "SYFPEITHI: database for MHC ligands and peptide motifs", *Immunogenetics*, vol. 50, pp. 213-219, 1999.
- [14] M. Nielsen, C. Lundegaard, P. Worning, S. L. Lauemøller, K. Lamberth, S. Buus, S. Brunak, O. Lund, "Reliable prediction of T-cell epitopes using neural networks with novel sequence representations", *Protein Science*, vol. 12, pp. 1007-1017, 2003.
